# Supplementary material
Source: PubMed Central journal article supplement (PMC2828691)
Supplement: tpc.109.069294_1.pdf [file tpc.109.069294_1.pdf]

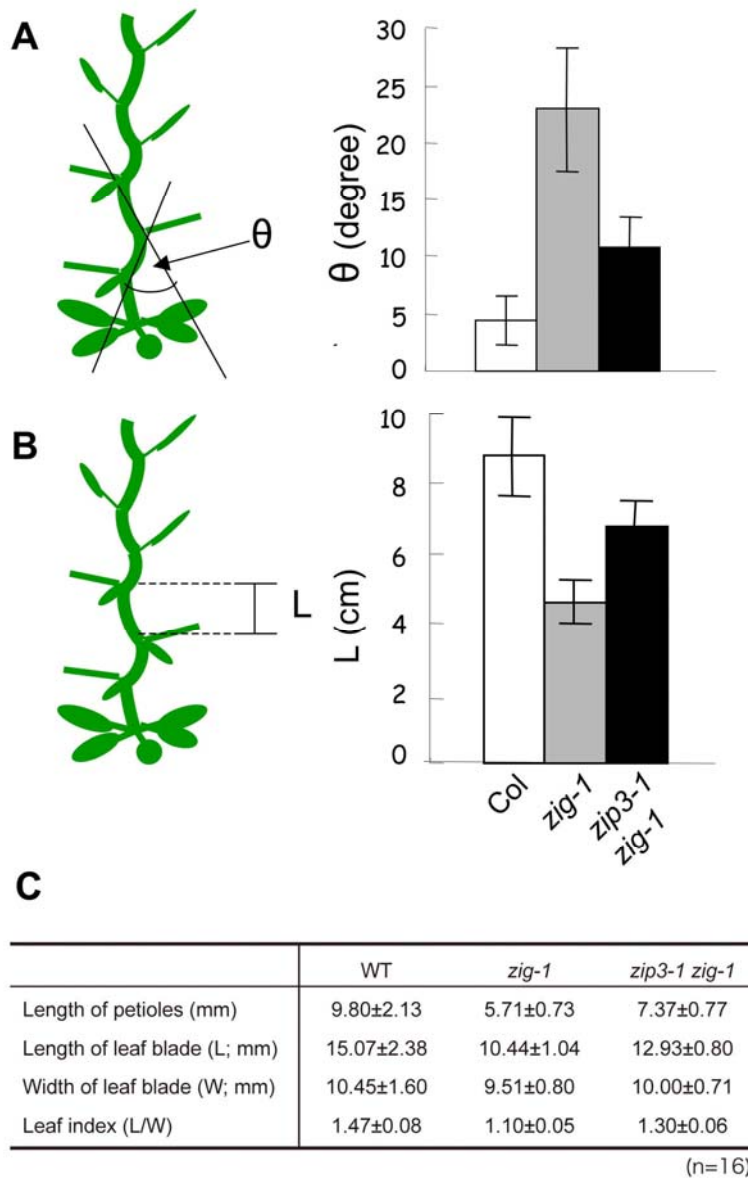

### Supplemental Figure 1. Morphological phenotype of *zip3-1 zig-1*.

We determined three morphological features to evaluate the suppression effect of *zip3-1* on the *zig-1* phenotype. **(A)** The angles between two adjacent internodes of the primary shoot in the *zig* mutant. N=12. **(B)** The internodal length in the second metamer. 7-8 week-old plants were used for measurement. N=12. **(C)** Leaf morphology. The fifth and sixth leaves from 4-week-old plants were used for the measurement. N=16. For all three features, the *zip3-1 zig-1* double mutant exhibited an intermediate phenotype between wild type and *zig-1*.

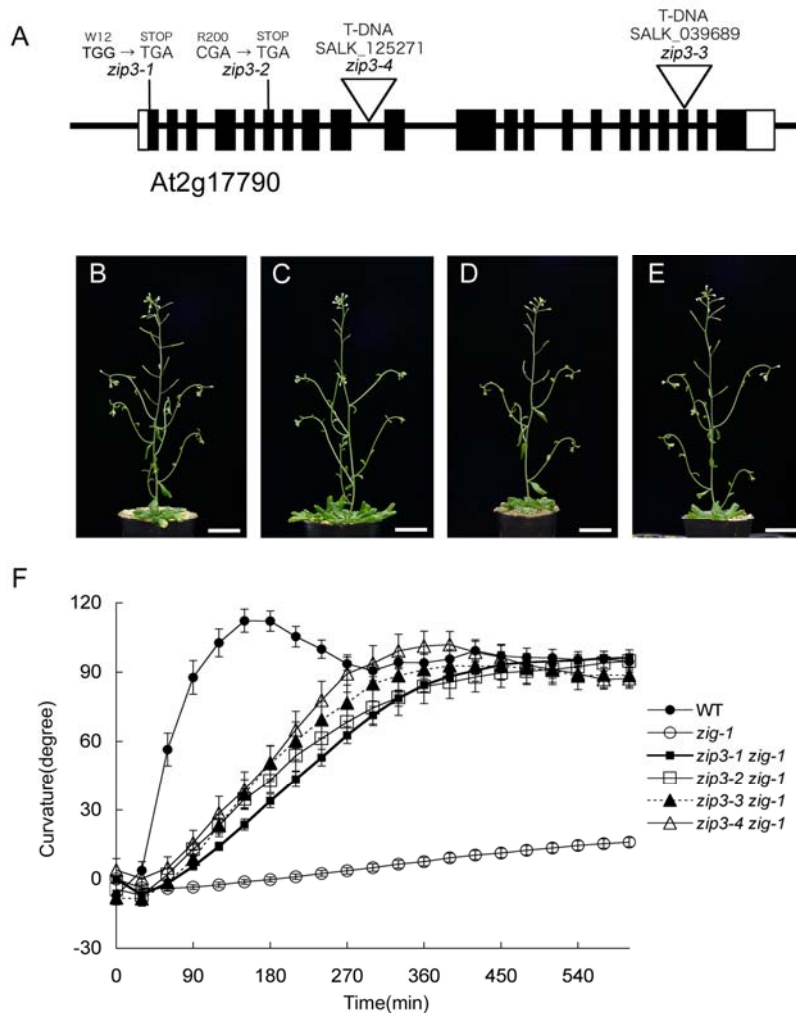

**Supplemental Figure 2. Phenotypes of alleles of *zip3 zig-1* double mutants.**

(A) Schematic structure of the *ZIP3* (*At2g17790*) gene and the position of mutations and T-DNA insertions. Boxes indicate exons and white boxes represent untranslated regions. Morphological phenotypes of 5-week-old plants of *zip3-1 zig-1* (B), *zip3-2 zig-1* (C), *zip3-3 zig-1* (D), and *zip3-4 zig-1* (E). Scale bars; 3 cm. (F) Gravitropic phenotypes. The gravitropic response of inflorescence stems of 5-week-old plants was gravi-stimulated by being placed horizontally at 23° C under dim non-directional light. 15 individuals of each genotype were examined. Bars represent SE.

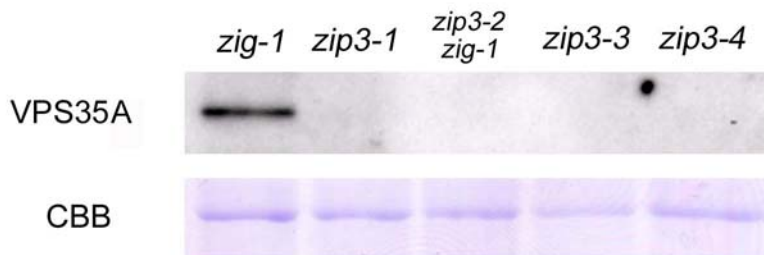

**Supplemental Figure 3. Immunoblot analysis of ZIP3/VPS35A protein**

Proteins were extracted from 2-week-old seedlings from each genotype and subjected to SDS-PAGE, followed by immunoblot analysis using anti-VPS35A antibody. An approximately 90-kDa protein band was detected only in extracts prepared from the wild type plant. Lower panel shows CBB staining to indicate that a similar amount of protein was applied to each lane of the gel.

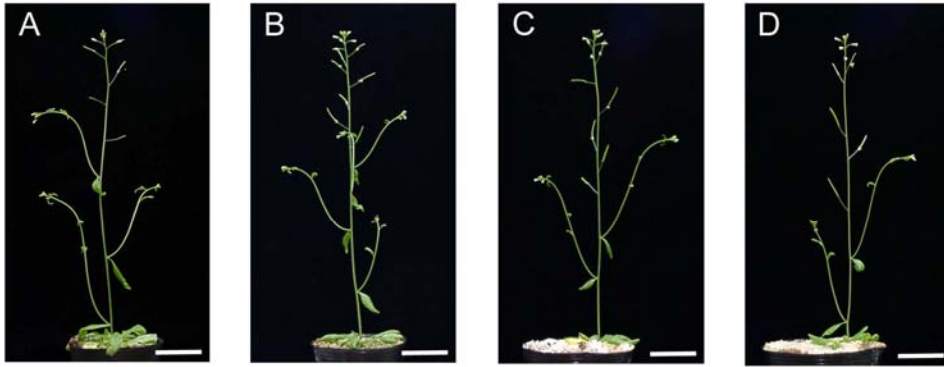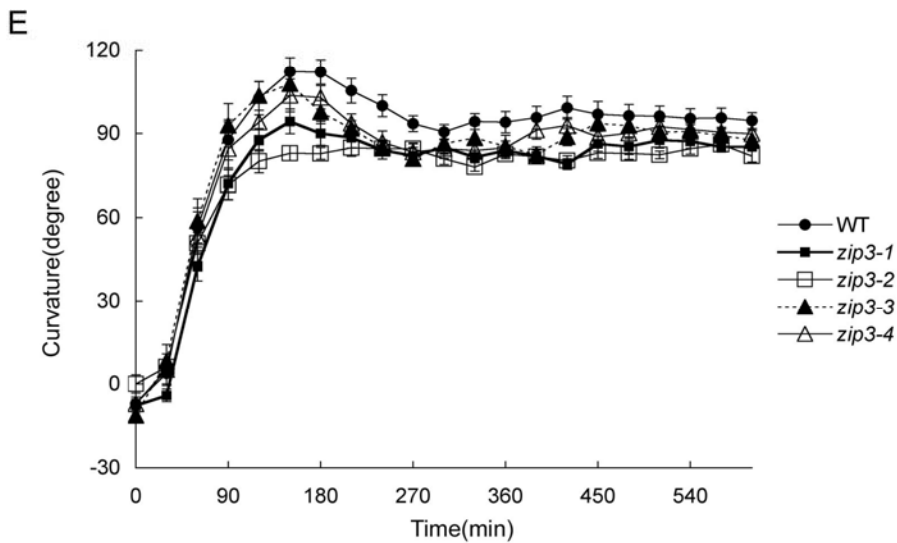

**Supplemental Figure 4. Phenotypes of alleles of *zip3* single mutants.**

5-week-old plants of *zip3-1* (A), *zip3-2* (B), *zip3-3* (C), and *zip3-4* (D). Scale bars; 3 cm.

(E) Gravitropic phenotypes. Gravitropic response of inflorescence stems of 5-week-old plants was gravi-stimulated by being placed horizontally at 23° C under dim non-directional light. 15 individuals of each genotype were examined. Bars represent SE.

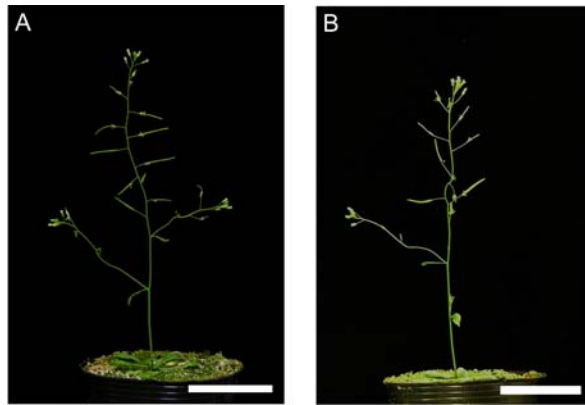

**Supplemental Figure 5. Morphological phenotypes of *mag1-1* and *mag1-1 zig-1* mutants.**

5-week-old plants of *mag1-1* (A), *mag1-1 zig-1* (B). Scale bars; 3 cm.

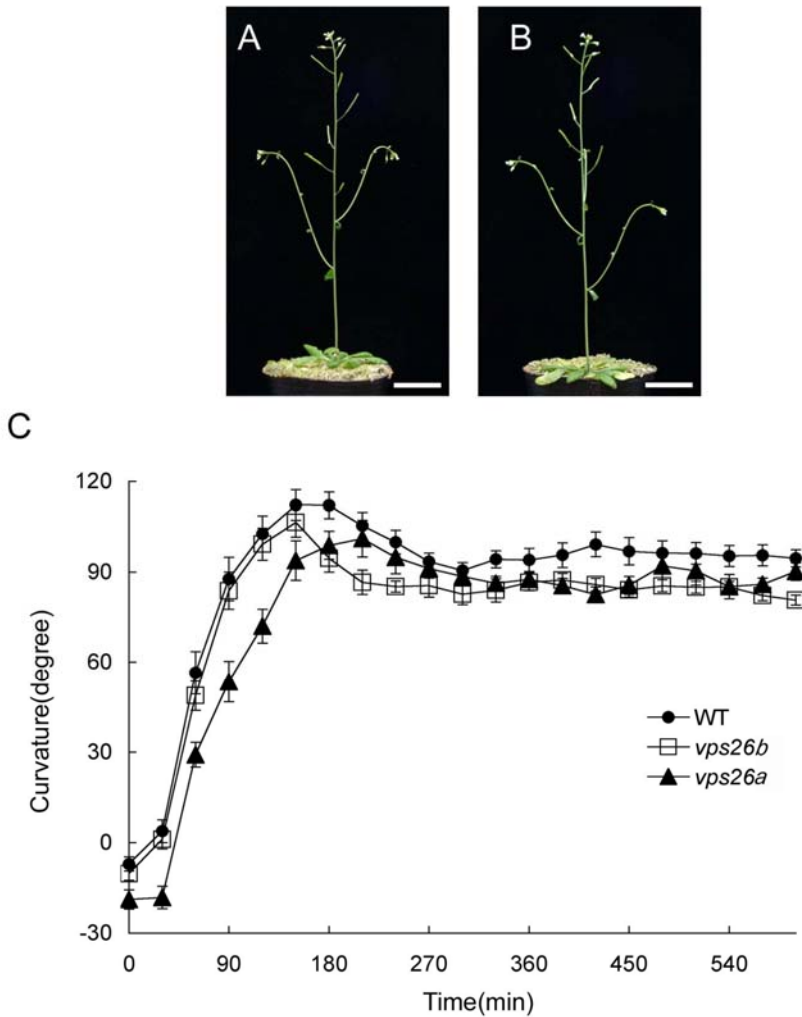

**Supplemental Figure 6. Phenotypes of *vps26* single mutants.**

The 5-week-old plants of *vps26a* (A) and *vps26b* (B). Scale bars; 3 cm. (C) Gravitropic phenotypes. Gravitropic response of inflorescence stems of 5-week-old plants were gravi-stimulated by being placed horizontally at 23° C under dim non-directional light. 15 individuals of each genotype were examined. Bars represent SE.

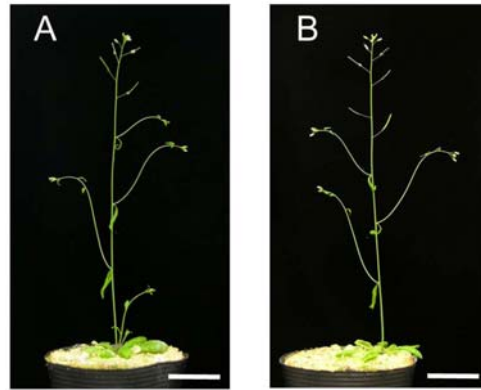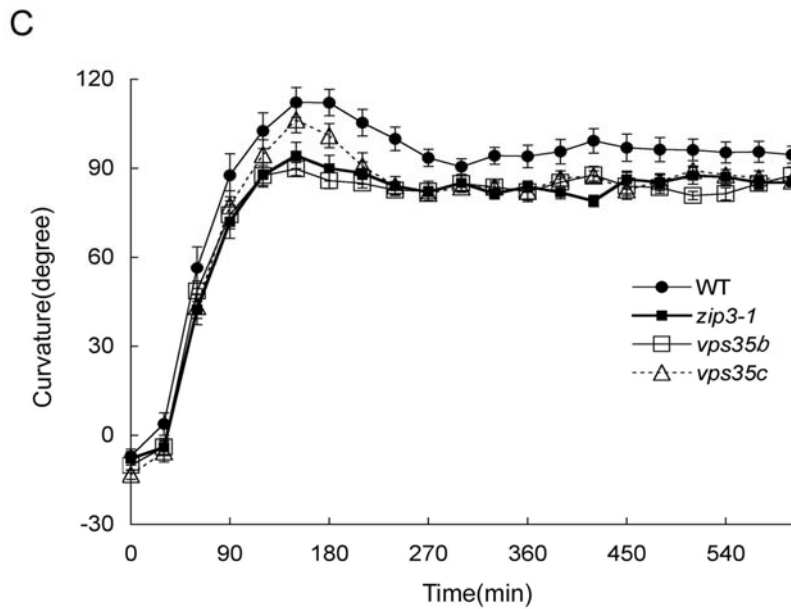

**Supplemental Figure 7. Phenotypes of *vps35b* and *vps35c* single mutants.**

5-week-old plants of *vps35b* (A) and *vps35c* (B). Scale bars; 3 cm. (C) Gravitropic phenotypes. Gravitropic response of inflorescence stems of 5-week-old plants was gravitropically stimulated by being placed horizontally at 23° C under dim non-directional light. 15 individuals of each genotype were examined. Bars represent SE.

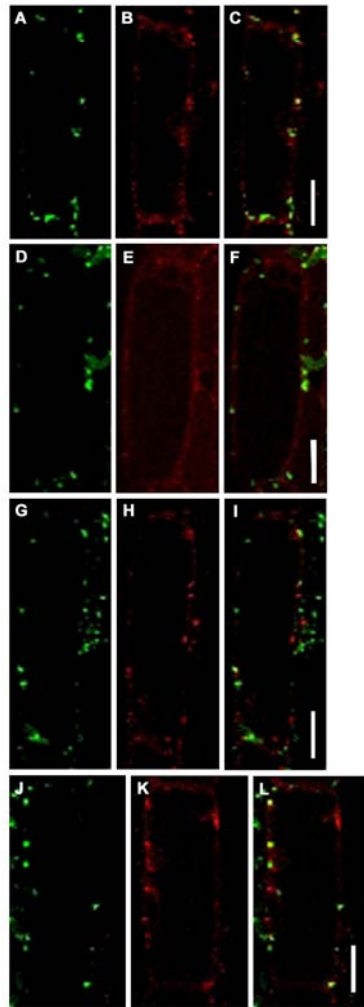

**M**

|             | WT         | <i>zig-1</i> | <i>zip3-1 zig-1</i> | <i>zip3-1</i> |
|-------------|------------|--------------|---------------------|---------------|
| GFP (VTI12) | 10.52±0.66 | 12.76±0.84   | 11.98±0.64          | 11.76±0.60    |
| RFP (ARA6)  | 12.98±0.80 | 12.86±0.82   | 10.02±0.60          | 12.44±0.64    |
| merge       | 3.64±0.34  | 2.72±0.29    | 2.28±0.21           | 2.42±0.23     |

(n = 50)

### Supplemental Figure 8. Localization of GFP-VTI12 and ARA6-mRFP in endodermal cells

Confocal images of GFP-VTI12 and ARA6-mRFP in endodermal cells. (A-C) wild type, (D-F) *zig-1*, (G-I) *zip3-1 zig-1*, (J-L) *zip3-1*. VTI12 and Ara6 were observed with GFP (A, D, G, H) and RFP fluorescence (B, E, H, K), respectively. *zip3-1 zig-1/VTI12pro:GFP-VTI12* and *WT/SCRpro:ARA6-mRFP* lines were crossed, and four genotypes of wild type, *zig-1*, *zip3-1 zig-1* and *zip3-1* bearing both constructs homozygously were isolated. (M) Quantitative analysis of GFP-, RFP- and both signal- positive dots. The number of dots in images of endodermal cell as shown in A to L was counted. Values represent means  $\pm$  SE. Fifty cells of each genotype were examined.



**Supplemental Table 1. Localization of amyloplasts in the endodermal cell.**

| <b>Position</b> | <b>WT</b>        | <b><i>zig-1</i></b> | <b><i>zip3-1 zig-1</i></b> | <b><i>zip3-1</i></b> |
|-----------------|------------------|---------------------|----------------------------|----------------------|
| <b>Top</b>      | <b>0.06±0.03</b> | <b>3.2±0.35</b>     | <b>0.22±0.07</b>           | <b>0.04±0.03</b>     |
| <b>Middle</b>   | <b>0.18±0.08</b> | <b>2.0±0.51</b>     | <b>0.36±0.12</b>           | <b>0.24±0.09</b>     |
| <b>Bottom</b>   | <b>5.16±0.24</b> | <b>2.94±0.28</b>    | <b>3.78±0.29</b>           | <b>4.8±0.33</b>      |

Localization of amyloplasts in the endodermal cell. An endodermal cell is divided into three areas (top, middle, bottom), and then the number of amyloplasts (mean  $\bar{X}$  } SD) located at each area was counted, based on the image of longitudinal sections shown in Figure 3 A -D. Fifty cells of each genotype were examined.

**Supplemental Table 2. Quantitative analysis of the cytological phenotype of living endodermal cells based on the observation as shown in Figure 3 H-K.**

|    | WT               | <i>zig-1</i>     | <i>zip3-1 zig-1</i> | <i>zip3-1</i>    |
|----|------------------|------------------|---------------------|------------------|
| Öü | <b>6.42±0.46</b> | <b>4.12±0.39</b> | <b>5.66±0.48</b>    | <b>6.6±0.63</b>  |
| Ö† | <b>3.04±0.34</b> | <b>0.16±0.07</b> | <b>1.78±0.23</b>    | <b>4.44±0.49</b> |
| Ö° | <b>0.46±0.21</b> | <b>4.14±0.39</b> | <b>2.1±0.30</b>     | <b>0.38±0.14</b> |
| Ö€ | <b>35</b>        | <b>5</b>         | <b>29</b>           | <b>33</b>        |
| Ö£ | <b>0</b>         | <b>13</b>        | <b>6</b>            | <b>0</b>         |

Quantitative analysis of the cytological phenotype of living endodermal cells based on the observation as shown in Figure 3 H-K. Time-lapse imaging for 5 min with 15 seconds-intervals were performed. Five characteristics of amyloplasts and vacuolar membrane were quantitatively observed in living endodermal cells (I to V). I; Average number of amyloplasts in an endodermal cell in a focal plane at a timepoint (time 0). II; Average number of amyloplasts that appeared to be enclosed by the vacuolar membrane within I. III; Average number of amyloplasts that hardly move during a 5 min-observation within I. IV; Number of cells in which transvacuolar strands arose during 5 min-observation, indicating vacuolar membrane dynamics. V; Number of cells in which abnormal clusters of vesicles were found during 5 min-observation. Fifty cells were observed for each genotype and then analyzed.

**Supplemental Table 3.****Primer sets for cloning and RT-PCR**

| Primer name | Sequence                             |
|-------------|--------------------------------------|
| gZIP3-F     | 5'CCCGGGAAATGTTAGATGCTTC-3'          |
| gZIP3-R     | 5'CCCGGGTTTACATTTTCGAGCAGC-3'        |
| cZIP3-F     | 5'GTTCCCGGGATGATCGCAGACGGATCAGA-3'   |
| cZIP3-R     | 5'GTTCCCGGGTACTTTGATCGCCTGGTATC-3'   |
| cVPS35B-F   | 5'CTTGGATCCATGAGAACGCTCGCCGGAGTAG-3' |
| cVPS35B-R   | 5'CTTGGATCCTCACAGCTTGATAGGGTCATA-3'  |
| cVPS35C-F   | 5'CTTGGATCCATGATCGCCGACGACGATGAG-3'  |
| cVPS35C-R   | 5'CTTGGATCCTCATTCAAACCATTCATTTTG-3'  |
| cVPS35B-F2  | 5'AAGAGTTCTTCTCTGTTAAGACG-3'         |
| cVPS35B-R2  | 5'TGTGTCTCGGATTTAAGTCACAGC-3'        |
| cVPS35C-F2  | 5'ATTCTGCAAGACTCCTAAGGAAGC-3'        |
| cVPS35C-R2  | 5'TCTTCTTGCTGTCTCTGAAACTCG-3'        |
| cVPS26A-F1  | 5'GTCTCTCTCCGATTGAAATAAACC-3'        |
| cVPS26A-R2  | 5'TGCATACAGAAAGTCTTGAAAAGG-3'        |
| cVPS26B-F1  | 5'ATTACGCTCTTAACATCAGCTTGG-3'        |
| cVPS26B-R2  | 5'ATCTGAGTACACAAAGTCTAAAGC-3'        |
| ACT8 Df     | 5'GAGAGATTCAGGTGCCAG -3'             |
| ACT8 Dr     | 5'AGAGCGAGAGCGGGTTTTCA -3'           |
| pSCR(-30)D  | 5'TCTTACCTTATTTATAACCTAGGC-3'        |
| cVPS35B-R1  | 5'GATACATTCTGGGCAATATGTTGC-3'        |
| cZIP3-R2    | 5'ATACAGTCTATTAGGTAATATTGG-3'        |
| cVPS35C-R1  | 5'ATTCATGTGTGCATCACCATCTCC-3'        |
